# Supplementary material for: Behavioural Development of Three Former Pet Chimpanzees a Decade after Arrival at the MONA Sanctuary
Source: MDPI journal article supplement (doi:10.3390/ani12020138), 2022-01-07
Supplement: s1 [file s1]

# Behavioural Development of Three Former Pet Chimpanzees a Decade after Arrival at the MONA Sanctuary

Feliu et al. (2022)

Supplementary Information

Table S1: Ethogram

|           | Behavioural Category | Behaviours                  | Definition                                                                                                                                                                                                                                                                                                                      |
|-----------|----------------------|-----------------------------|---------------------------------------------------------------------------------------------------------------------------------------------------------------------------------------------------------------------------------------------------------------------------------------------------------------------------------|
| Behaviour | Abnormal behaviour   | Pacing*                     | Repetitive and invariant movement on the same path for no apparent reason                                                                                                                                                                                                                                                       |
|           |                      | Overgrooming                | Repetitive and invariant body cleaning behaviour directed to a specific area of own body with fingers or mouth including pulling out hair                                                                                                                                                                                       |
|           |                      | Coprophagy                  | Ingestion and manipulation of faeces with mouth                                                                                                                                                                                                                                                                                 |
|           |                      | Fence biting                | Repetitive and invariant biting of the fence                                                                                                                                                                                                                                                                                    |
|           | Feeding              | Food intake                 | Intake of food and liquids                                                                                                                                                                                                                                                                                                      |
|           |                      | Forage                      | Searching for and localisation of food                                                                                                                                                                                                                                                                                          |
|           |                      | Food manipulation           | Hoarding and transport of food; playing with food; inspection of feeding enrichment                                                                                                                                                                                                                                             |
|           | Locomotion           |                             | Moving (horizontal) or climbing (vertical)                                                                                                                                                                                                                                                                                      |
|           | Resting              |                             | Sitting, lying, dozing, or sleeping                                                                                                                                                                                                                                                                                             |
|           | Solitary             | Object manipulation         | Inspection of objects of the environment and non-food enrichment with hands and/or feet                                                                                                                                                                                                                                         |
|           |                      | Solitary play               | Solitary motor play including swinging, hanging, jumping, pivoting, sliding;<br>object play when carrying or using object(s) accompanied by laughing and showing a play face                                                                                                                                                    |
|           |                      | Self-directed               | Inspection of own body, autogrooming with fingers and/or mouth                                                                                                                                                                                                                                                                  |
|           | Social conspecific   | Agonistic behaviour         | Aggression with body contact including hits, bites, fighting and scratching; aggression without body contact including threats and chasing;<br>display with piloerection, including running, jumping, hitting objects, body swaying and vocalizations;<br>submissive behaviour including fleeing and screaming;<br>displacement |
|           |                      | Social play                 | Play chase where one chases the other individual;<br>rough-and-tumble play including hitting and pushing;<br>muzzling with gentle bites;<br>holding hands where the playing individuals touch their hands;<br>social object play;<br>often accompanied by play face and laughing                                                |
|           |                      | Allogrooming                | Body-cleansing behaviour from one individual towards another individual with fingers and/or mouth, includes mutual grooming; grooming request                                                                                                                                                                                   |
|           |                      | Other affiliative behaviour | Touching, embracing another individual, hold out hand                                                                                                                                                                                                                                                                           |
|           |                      | Socio-sexual behaviour      | Genital inspection includes the manipulation of the genitals by visual, olfactory or physical inspection;<br>genital presentation where the female presents her anogenital region towards the male; copulation                                                                                                                  |

|             |                      |                                                                        |                                                                                                                                                                                                                                                   |
|-------------|----------------------|------------------------------------------------------------------------|---------------------------------------------------------------------------------------------------------------------------------------------------------------------------------------------------------------------------------------------------|
|             | Social interspecific | Affiliative and agonistic interactions with human and/or other animals | Request for interaction or affiliative interactions with humans (keepers, observers, visitors) and/or other animals (dogs, horses, macaques); display towards humans (keepers, observers, visitors) and/or other animals (dogs, horses, macaques) |
|             | Vigilance            |                                                                        | Scanning of or staring at the environment while sitting or standing in a tight body posture                                                                                                                                                       |
|             | Other                | Excretion                                                              | Defecate/Urinate                                                                                                                                                                                                                                  |
|             |                      | Masturbation                                                           | Self stimulation of the genitals with hand and/or mouth                                                                                                                                                                                           |
|             | Close proximity      |                                                                        | Staying in body contact up to an arm's length to another individual without interacting                                                                                                                                                           |
| Association |                      |                                                                        |                                                                                                                                                                                                                                                   |

\* Please note that Pacing has been assigned to Locomotion during the pre-rescue period (i.e., when living as pets).
